# Supplementary material for: Ultra-sensitive speciation analysis of inorganic platinum-chloride complexes in platinum-based drugs by HPLC-ICP-MS
Source: Royal Society of Chemistry journal article supplement (doi:10.1039/d2ja00126h), 2022-01-01
Supplement: d2ja00126h1.pdf [file d2ja00126h1.pdf]

**Electronic supplementary information for**

**Ultra-sensitive speciation analysis of inorganic platinum-chloride complexes in platinum-based drugs**

**by HPLC-ICP-MS**

Zhenzhen Yao,<sup>‡</sup> Bingru Li,<sup>‡</sup> Cheng Li, Beihong Wang, Meng Zhao, Zhihong Ma\*

*Institute of Quality Standard and Testing Technology, BAAFS (Beijing Academy of Agriculture and Forestry Sciences), Beijing 100097, China*

<sup>‡</sup>*These authors contributed equally.*

Corresponding authors: Tel: +86-10-51503405

E-mail address: mazh@iqstt.cn

**Figure captions**

Figure. S-1 Schematic diagram of experimental setup of HPLC-ICP-MS.

Figure S-2 Chromatograms of the separation using different columns.

Figure S-3 Effect of storage time on  $K_2PtCl_6$  and  $K_2PtCl_4$  (n = 3).

**Table titles**

Table S-1 Information of target analytes.

Table S-2 Samples information.

Table S-3 Operational sequence of the measurement procedure for Pt species by the automated matrix removal device.

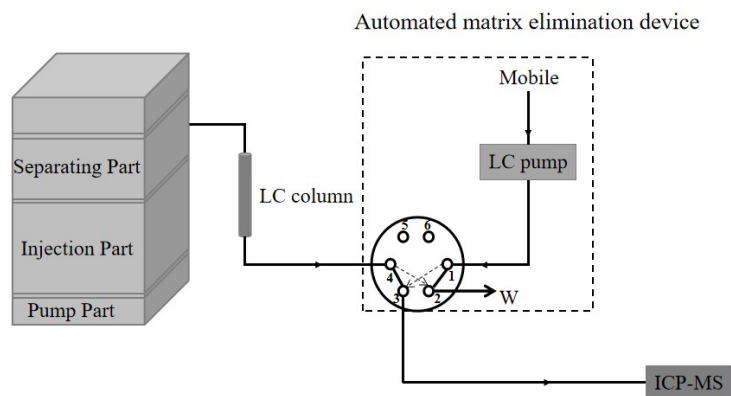

**Fig. S-1 Schematic diagram of experimental setup of HPLC-ICP-MS. Mobile: 2mmol L<sup>-1</sup> HCl, W: waste.**

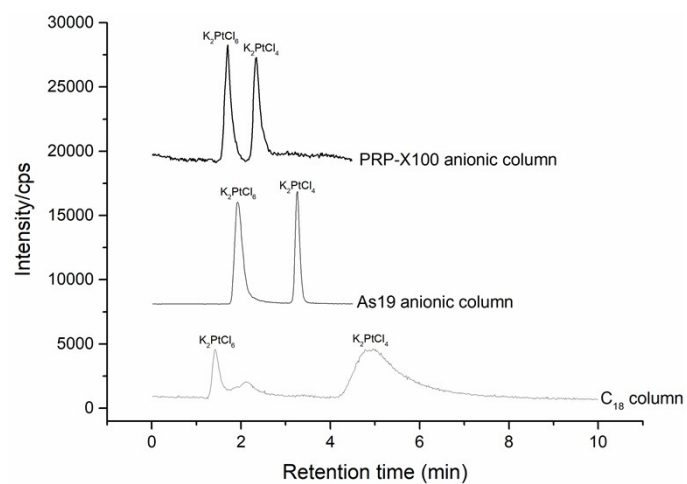

**Fig. S-2 Chromatograms of the separation using different columns.** Here,  $10 \mu\text{g L}^{-1}$   $\text{K}_2\text{PtCl}_6$  and  $\text{K}_2\text{PtCl}_4$  were introduced. The mobile phase for all three columns:  $2\text{mmol L}^{-1}$  HCl. Other operational conditions were performed as Table 1.

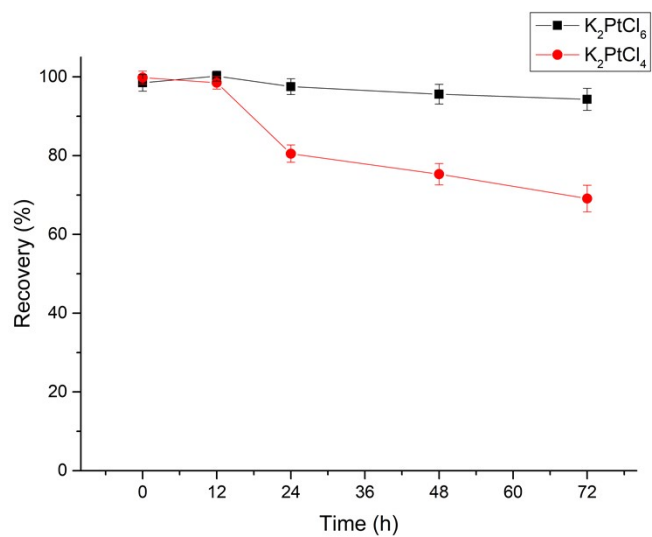

**Fig. S-3** Effect of storage time on  $K_2PtCl_6$  and  $K_2PtCl_4$ (n=3).

**Table S-1 Information of target analytes.**

| Analyte name                  | CAS#       | Formula                                                         | Structure                                                                            |
|-------------------------------|------------|-----------------------------------------------------------------|--------------------------------------------------------------------------------------|
| Cisplatin                     | 15663-27-1 | $\text{Pt}(\text{NH}_3)_2\text{Cl}_2$                           | 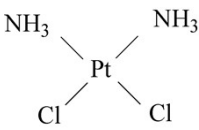  |
| Carboplatin                   | 41575-94-4 | $[\text{C}_4\text{H}_6(\text{CO}_2)_2]\text{Pt}(\text{NH}_3)_2$ |    |
| Oxaliplatin                   | 61825-94-3 | $\text{C}_8\text{H}_{14}\text{N}_2\text{O}_4\text{Pt}$          |    |
| Potassium hexachloroplatinate | 16921-30-5 | $\text{K}_2\text{PtCl}_6$                                       |   |
| Potassium chloroplatinate     | 10025-99-7 | $\text{K}_2\text{PtCl}_4$                                       |  |

**Table S-2 Samples information.**

|   | Sample name | type   | Specification          | URL                                                                                                                                                                             |
|---|-------------|--------|------------------------|---------------------------------------------------------------------------------------------------------------------------------------------------------------------------------|
| 1 | Carboplatin | liquid | 10 mg mL <sup>-1</sup> | <a href="http://ypk.39.net/847226/manual">http://ypk.39.net/847226/manual</a>                                                                                                   |
| 2 | Cisplatin   | liquid | 5 mg mL <sup>-1</sup>  | <a href="https://www.315jiage.cn/mn155928.aspx">https://www.315jiage.cn/mn155928.aspx</a>                                                                                       |
| 3 | Oxaliplatin | liquid | 1mg mL <sup>-1</sup>   | <a href="http://ypk.39.net/862484/manual?ivk_sa=1024320u">http://ypk.39.net/862484/manual?ivk_sa=1024320u</a>                                                                   |
| 4 | Cisplatin   | solid  | 20 mg                  | <a href="https://www.315jiage.cn/mn106604.aspx">https://www.315jiage.cn/mn106604.aspx</a>                                                                                       |
| 5 | Carboplatin | solid  | 100 mg                 | <a href="http://www.haoranbio.com/ProductDetails-652770.aspx">http://www.haoranbio.com/ProductDetails-652770.aspx</a>                                                           |
| 6 | Oxaliplatin | solid  | 100 mg                 | <a href="https://yy.hrhnyy.cn/_shop/product-befa7b632a81ca66.shtml?skuId=6tyxludo9lejzlua">https://yy.hrhnyy.cn/_shop/product-befa7b632a81ca66.shtml?skuId=6tyxludo9lejzlua</a> |

**Table S-3 Operational sequence of the measurement procedure for Pt species by the automated matrix removal device.**

| Operation time<br>(min) | Mode | Switch valve position |
|-------------------------|------|-----------------------|
| 0-0.2                   | A    | 4→3 1→2               |
| 0.2-1                   | B    | 4→2 1→3               |
| 1-3                     | A    | 4→3 1→2               |
| 3-5                     | B    | 4→2 1→3               |
